# Supplementary material for: Reproductive Toxicity and Life History Study of Silver Nanoparticle Effect, Uptake and Transport in Arabidopsis thaliana
Source: Nanomaterials (Basel). 2014 Apr 22;4(2):301–18. doi: 10.3390/nano4020301 (PMC5304678; doi:10.3390/nano4020301)
Supplement: Supplementary File 1 [file nanomaterials-04-00301-s001.pdf]

## Supplementary Information

**Table S1.** The dosages of irrigation per plant over the growth period. The total volume was 960 mL.

| Days after planting (DAP) | Volume (mL) | Event(s)                         |
|---------------------------|-------------|----------------------------------|
| 0                         | 0           | Sowing seeds                     |
| 4                         | 0           | Transferred from 4 °C to 20 °C   |
| 14                        | 3           | Dome 1/4 opened                  |
| 18                        | 3           | Dome 1/2 opened                  |
| 21                        | 3           | Dome completely open             |
| 25                        | 3           |                                  |
| 28                        | 3           |                                  |
| 32                        | 3           |                                  |
| 35                        | 9           |                                  |
| 39                        | 9           |                                  |
| 42                        | 9           |                                  |
| 46                        | 45          |                                  |
| 49                        | 45          |                                  |
| 53                        | 45          |                                  |
| 56                        | 45          |                                  |
| 61                        | 45          |                                  |
| 63                        | 45          |                                  |
| 67                        | 45          |                                  |
| 70                        | 60          |                                  |
| 74                        | 60          |                                  |
| 77                        | 60          |                                  |
| 81                        | 90          |                                  |
| 84                        | 90          |                                  |
| 88                        | 120         |                                  |
| 91                        | 120         |                                  |
| 95                        | 0           | Tissue harvest & soil collection |

**Figure S1.** Illustration of E0–E3 generations.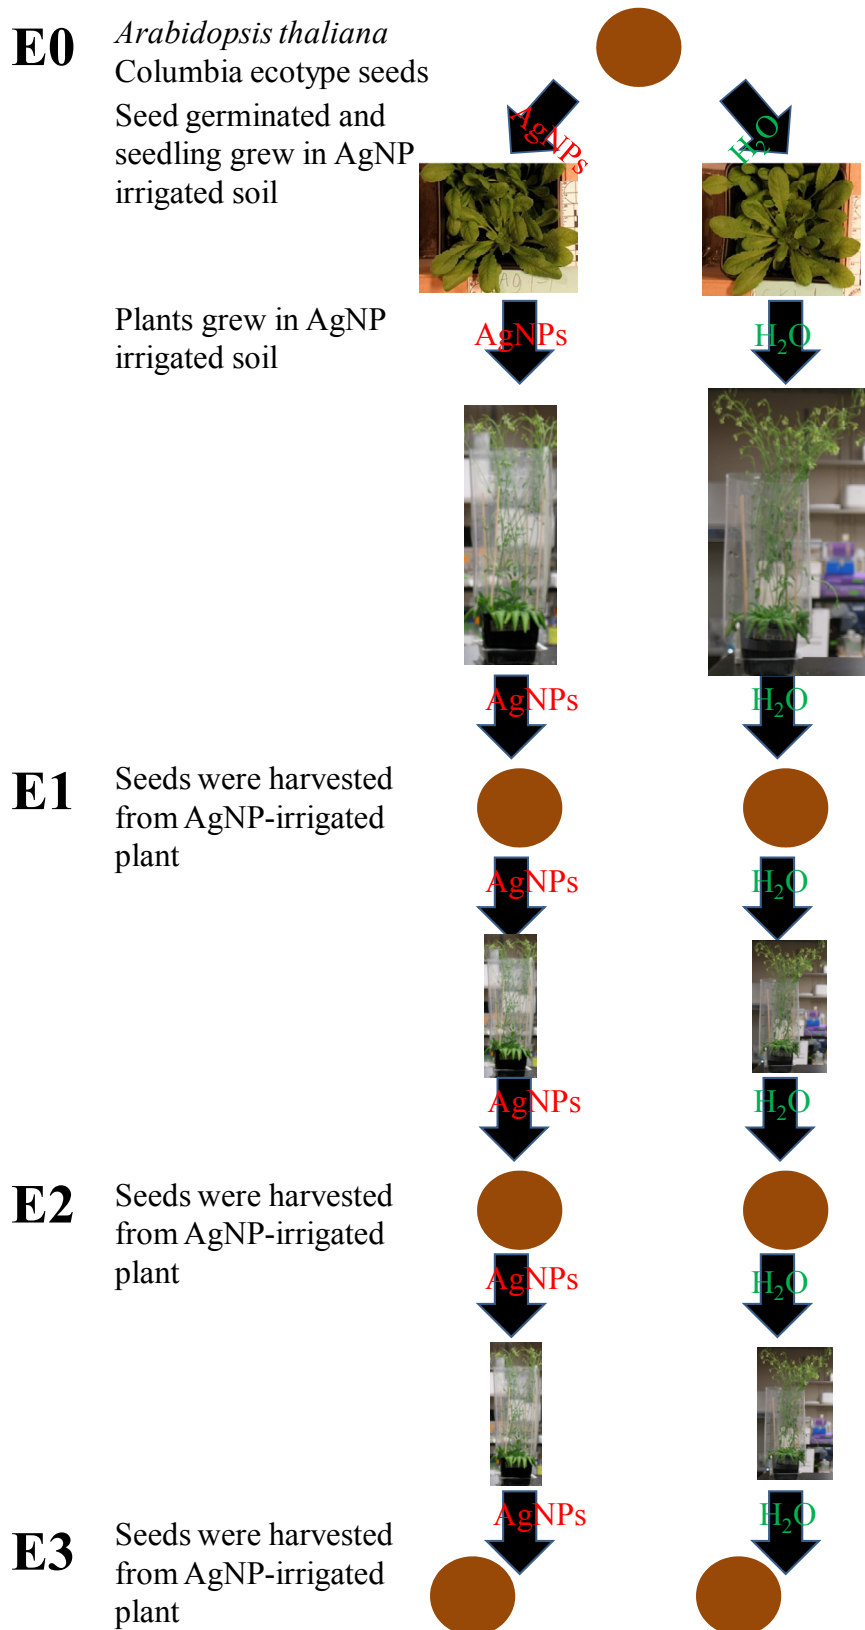

**Figure S2.** Reproductive traits of control, AgNP-treated and AgNO<sub>3</sub>-treated plants. (A) Inflorescence height from 50 to 61 DAP; (B) Flower numbers from 52 to 64 DAP; (C) Siliques numbers from 57 to 64 DAP; (D) Seed weight (in mg) per 100 seeds for control, two concentrations of AgNPs 75 µg/L (as 75 AgNPs) and 300 µg/L (as 300 AgNPs) and two concentrations of AgNO<sub>3</sub> 4.25 µg/L (as 4.25 AgNO<sub>3</sub>) and 17 µg/L (as 17 AgNO<sub>3</sub>).

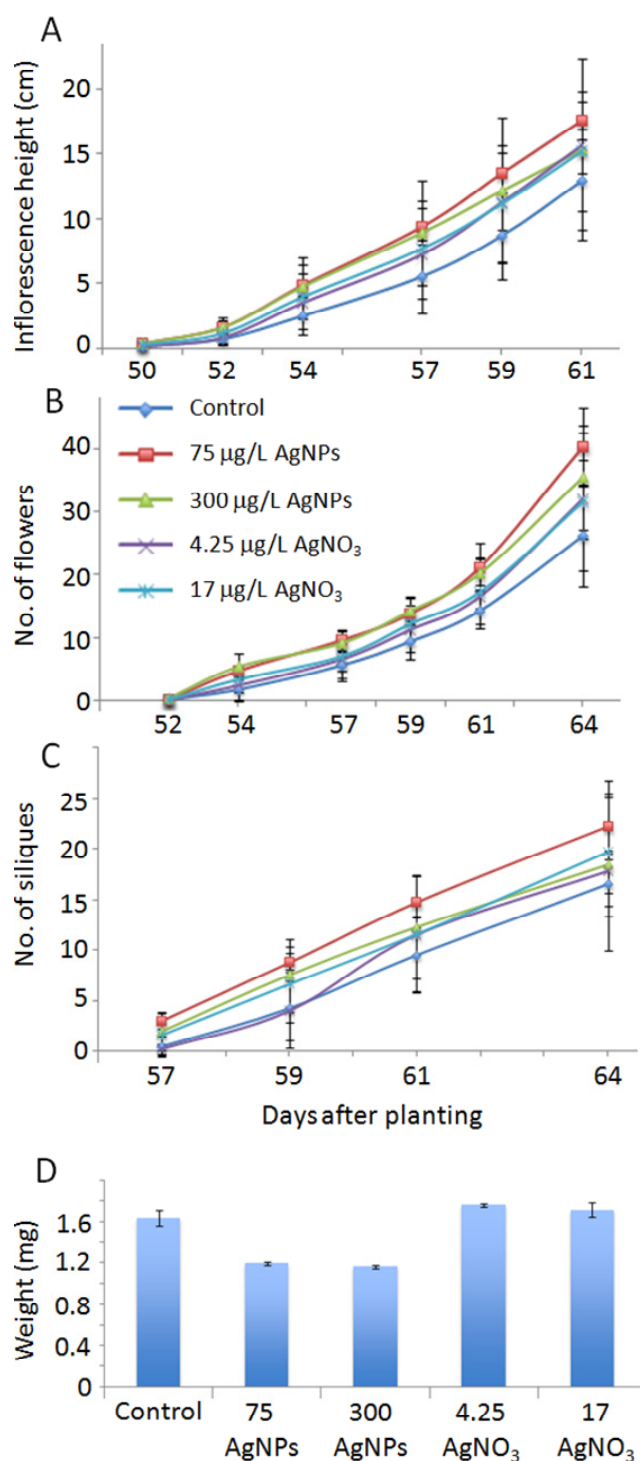

**Figure S3.** Accumulation of AgNPs in the Arabidopsis root tip at 14 DAP. (A) control plant; (B) AgNPs treated plant. Each figure (A,B) contains four panels: top left, AgNPs (in red); top right, GFP (in green); bottom left, brightfield; bottom right, composite of the three.

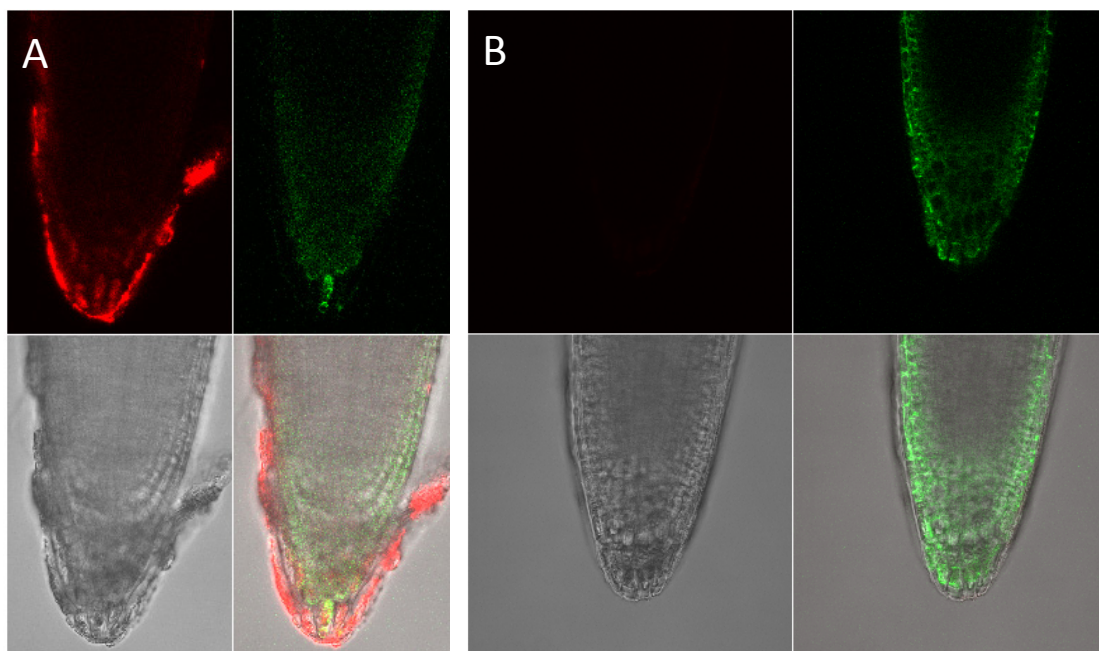

**Figure S4.** Original four panels for each of (A–F) in Figure 3. Four panels were: top left, AgNPs (in red); top right, GFP (in green); bottom left, brightfield; bottom right, composite of the three.

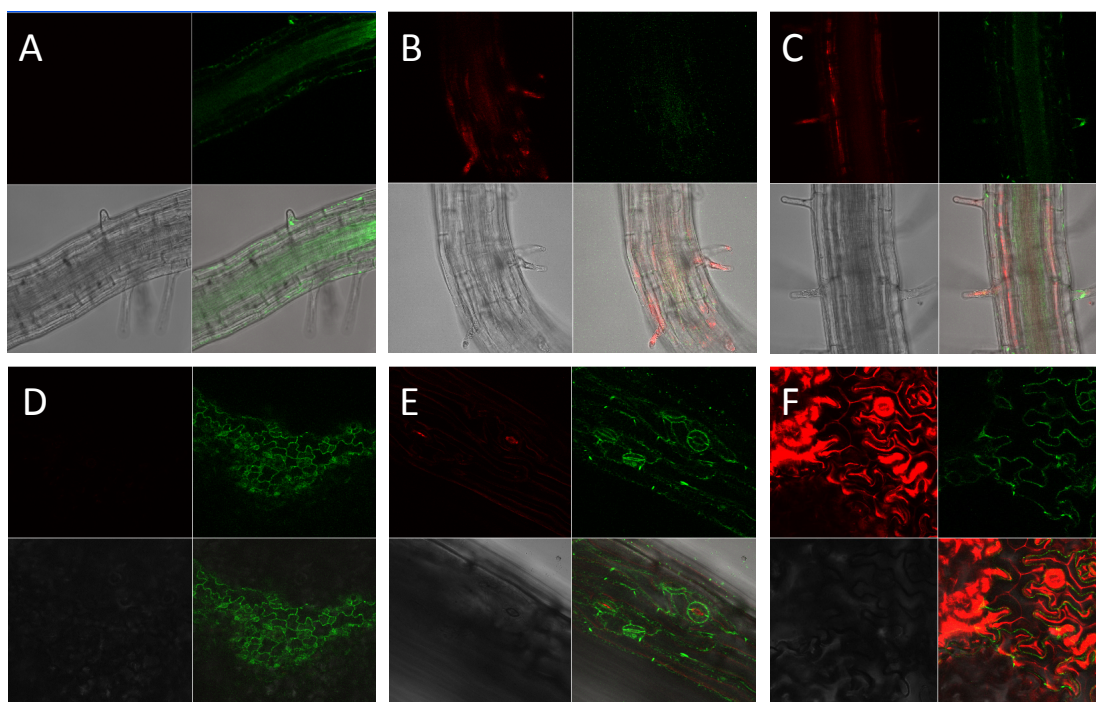

**Figure S5.** Using an energy dispersive X-ray spectroscopy (EDS) to view signals of Ag. (A) SEM image of one AgNPs-treated root hair; (B) EDS-detection of Ag (*i.e.*, turquoise color) in addition to show other different elements (C, O, K, S).

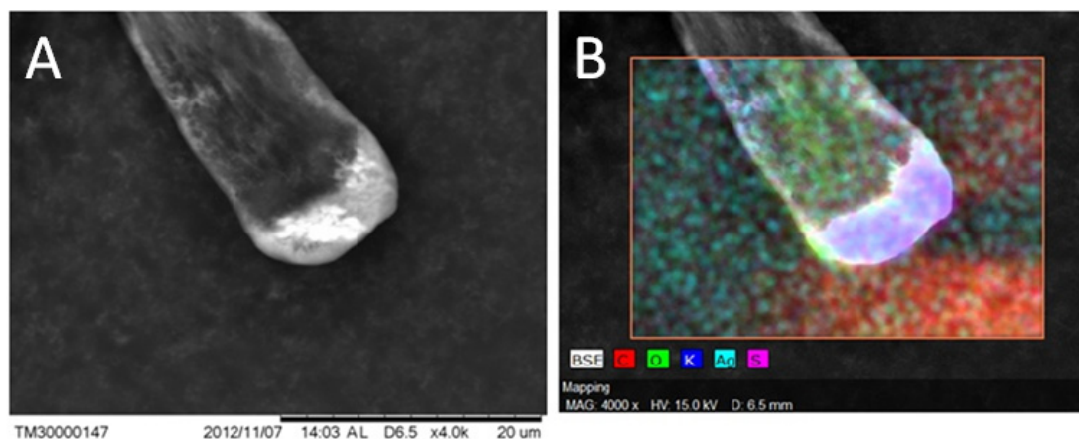

**Figure S6.** Lateral root primordia and lateral roots of AgNP-treated Arabidopsis plants. (A,B) 14 DAP; (C) 17 DAP; (D) control of 17 DAP. Each figure (A–D) contains four panels: top left, AgNPs (in red); top right, GFP (in green); bottom left, brightfield; bottom right, composite of the three. (A) Few AgNPs entered a lateral root, but overall the lateral root was functional. (B) Some AgNPs entered a lateral root primordium. (C) AgNPs already entered vascular tissue and its lateral root. (D) Control root does not have AgNPs.

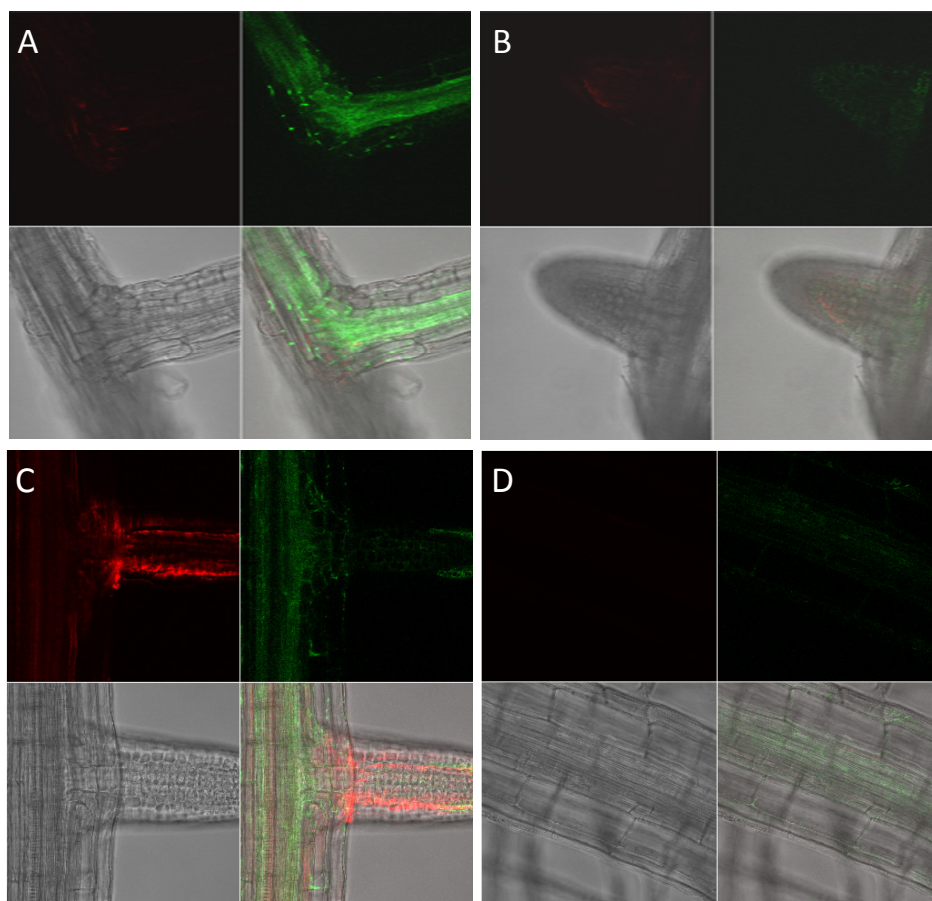

**Figure S7.** Detection of AgNP accumulation in root tips by SEM. (A) Overview of an Arabidopsis root with AgNP accumulation in its tip (black arrow); (B) Enlarged tip of (A).

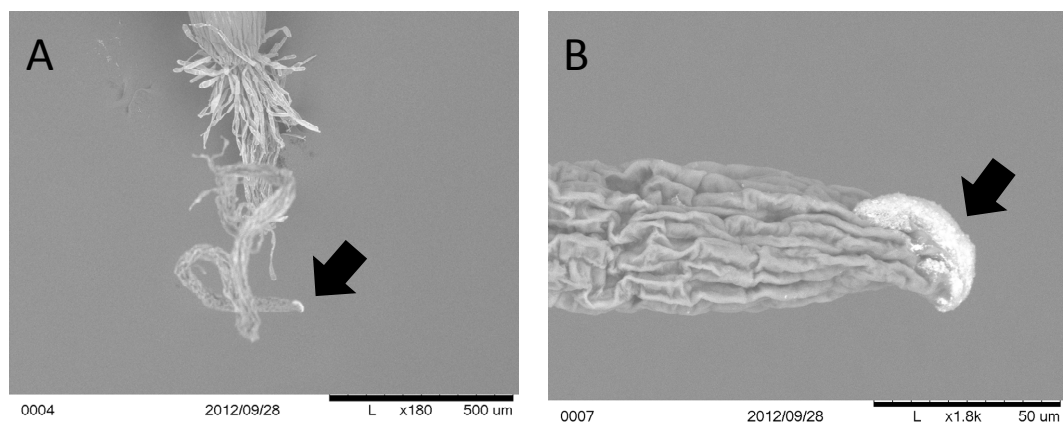

© 2014 by the authors; licensee MDPI, Basel, Switzerland. This article is an open access article distributed under the terms and conditions of the Creative Commons Attribution license (<http://creativecommons.org/licenses/by/3.0/>).
